# Supplementary material for: Tailoring Digital Tools to Address the Radiation and Health Information Needs of Returnees after a Nuclear Accident
Source: MDPI journal article supplement (doi:10.3390/ijerph182312704), 2021-12-02
Supplement: s1 [file s1]

---

Table S1. Recommendations of the SHAMISEN-SINGS project on the design of applications for health and well-being in a nuclear accident [5].

| No. | Recommendations                                        |
|-----|--------------------------------------------------------|
| 1   | Optimize content with stakeholders                     |
| 2   | Balance content, security, and development cost        |
| 3   | Develop a user support system                          |
| 4   | Apply incentives to promote usage                      |
| 5   | Respond to queries about radiation and health          |
| 6   | Involve vulnerable populations                         |
| 7   | Accommodate multiple languages                         |
| 8   | Consider ethical issues, especially privacy protection |

---
